# Supplementary material
Source: PubMed Central journal article supplement (PMC2659189)
Supplement: M809354200_1.pdf [file M809354200_1.pdf]

## Supplemental Figure S1

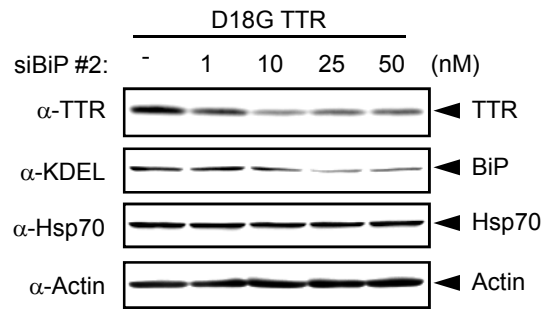

**Supplemental Fig. S1.** Intracellular level of D18G TTR is decreased by BiP siRNA #2. BiP siRNA (siBiP) #2 was transiently co-transfected with D18G TTR in HeLa cells at the indicated concentration. After 48 h, cells were lysed and analyzed by Western blotting with anti-KDEL, anti-Hsp70 and anti-Actin antibodies.

## Supplemental Figure S2

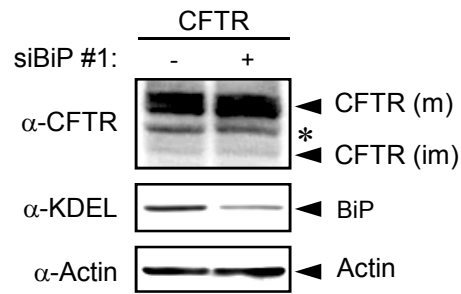

**Supplemental Fig. S2.** Twenty-five nM BiP siRNA (siBiP) #1 or control siRNA and human wild-type CFTR were transiently transfected in HeLa cells. After 48 h, cells were lysed and subjected to Western blotting with anti-CFTR (clone 24-1, Genzyme/Techne), anti-KDEL and anti-Actin antibodies. Immunological bands were visualized with chemiluminescence reagent SuperSignal. (im) and (m) indicate immature and mature CFTR bands, respectively. Asterisk (\*) indicates non-specific band.

### Supplemental Figure S3

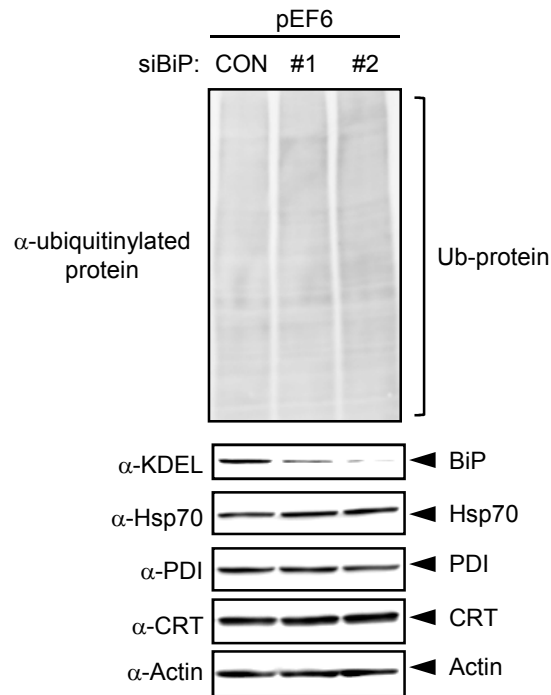

**Supplemental Fig. S3.** Protein ubiquitinylation and molecular chaperones except BiP are not affected by BiP siRNA treatment. Twenty-five nM BiP siRNA (siBiP) #1, BiP siRNA #2 or Control siRNA (CON) was transiently co-transfected with pEF6 vector in HeLa cells. After 48 h, cell lysates were analyzed by Western blotting with anti-TTR, anti-KDEL, anti-Hsp70, anti-PDI, anti-CRT and anti-Actin antibodies.
